# Supplementary material
Source: Springer Nature journal article supplement (https://www.springermedizin.de/resource/supplementary/12943_2010_812_MOESM6_ESM.pdf/9554888)

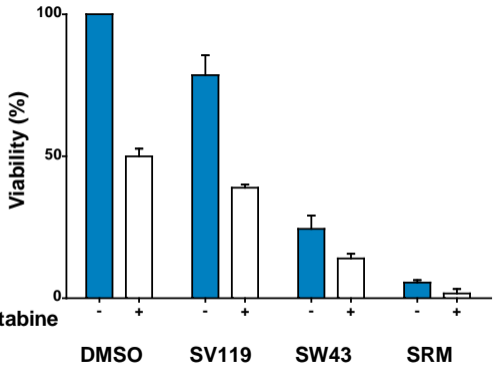

gemcitabine

DMSO

SV119

SW43

SRM

Supplement: MOESM6 [file 9554888]
